# Supplementary material for: Exostosin 1 Knockdown Induces Chemoresistance in MV3 Melanoma Cells by Upregulating JNK and MEK/ERK Signaling
Source: MDPI journal article supplement (doi:10.3390/ijms24065452), 2023-03-13
Supplement: s1 [file s1]

# Exostosin 1 Knockdown Induces Chemoresistance in MV3 Melanoma Cells by Upregulating JNK and MEK/ERK Signaling

Vladlena Pfeifer , Heiko Weber , Yuanyuan Wang , Martin Schlesinger , Christian Gorzelanny and Gerd Bendas

Supplementary Figures:

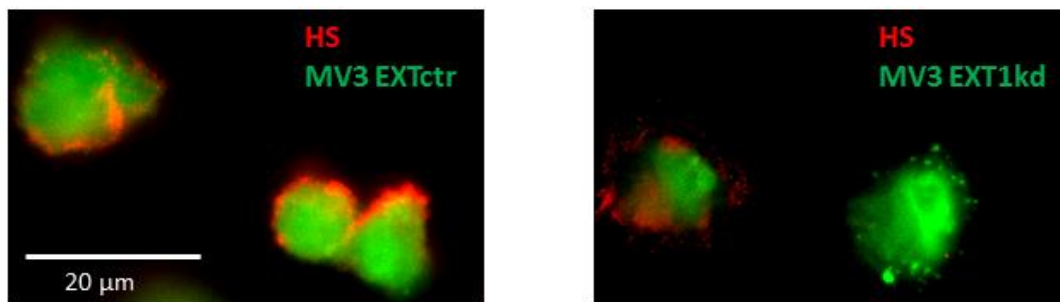

**Figure S1** – HS configuration of MV3<sup>EXT<sub>ctr</sub></sup> cells and MV3<sup>EXT1<sub>kd</sub></sup> visualized with immunofluorescence microscopy detecting glycans by staining with a ATTO 646 N-conjugated WGA.

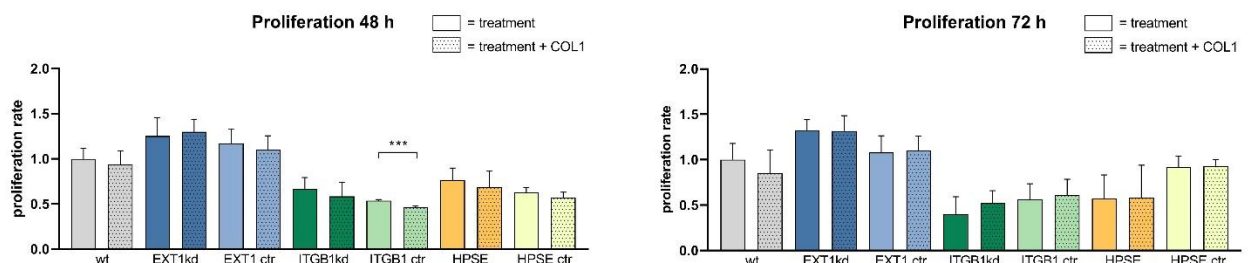

**Figure S2** –Cell proliferation rate of MV3 wild type cells and different transfected MV3 cells (MV3<sup>EXT1<sub>kd</sub></sup> and MV3<sup>EXT1<sub>ctr</sub></sup>, MV3<sup>ITGB1<sub>kd</sub></sup> and MV3<sup>ITGB1<sub>ctr</sub></sup>, MV3<sup>HPSE</sup> and MV3<sup>HPSE<sub>ctr</sub></sup>) versus unspecific control on uncoated or COL1-coated surfaces. Proliferation rate was detected by MTT assay, shown here for 48 h and 72 h in addition to the data given in Figure 1 a and b.

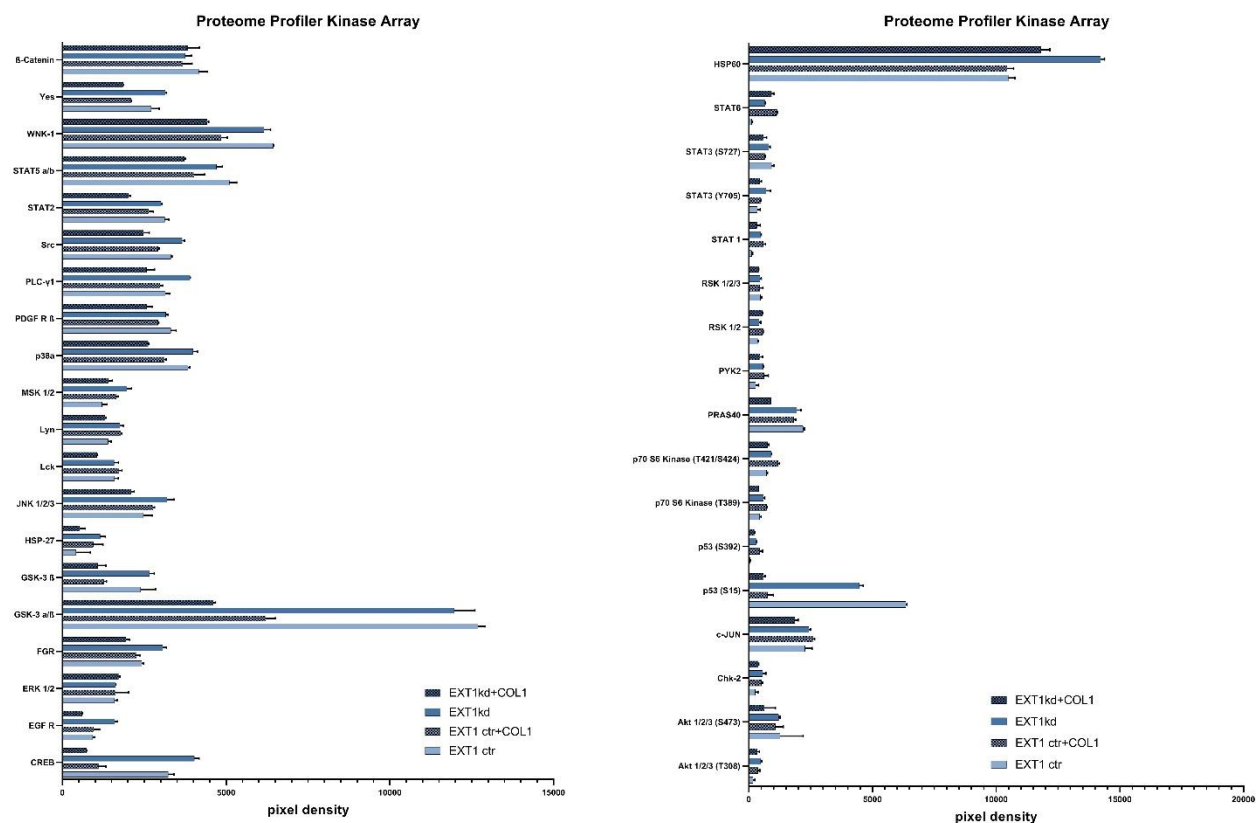

**Figure S3** - Proteome Profiler™ human Phospho-Kinase Array was performed with MV3<sub>EXT1kd</sub> and MV3<sub>EXTctr</sub> cells. Data depict the relative expression of kinases in  $n = 2$ .

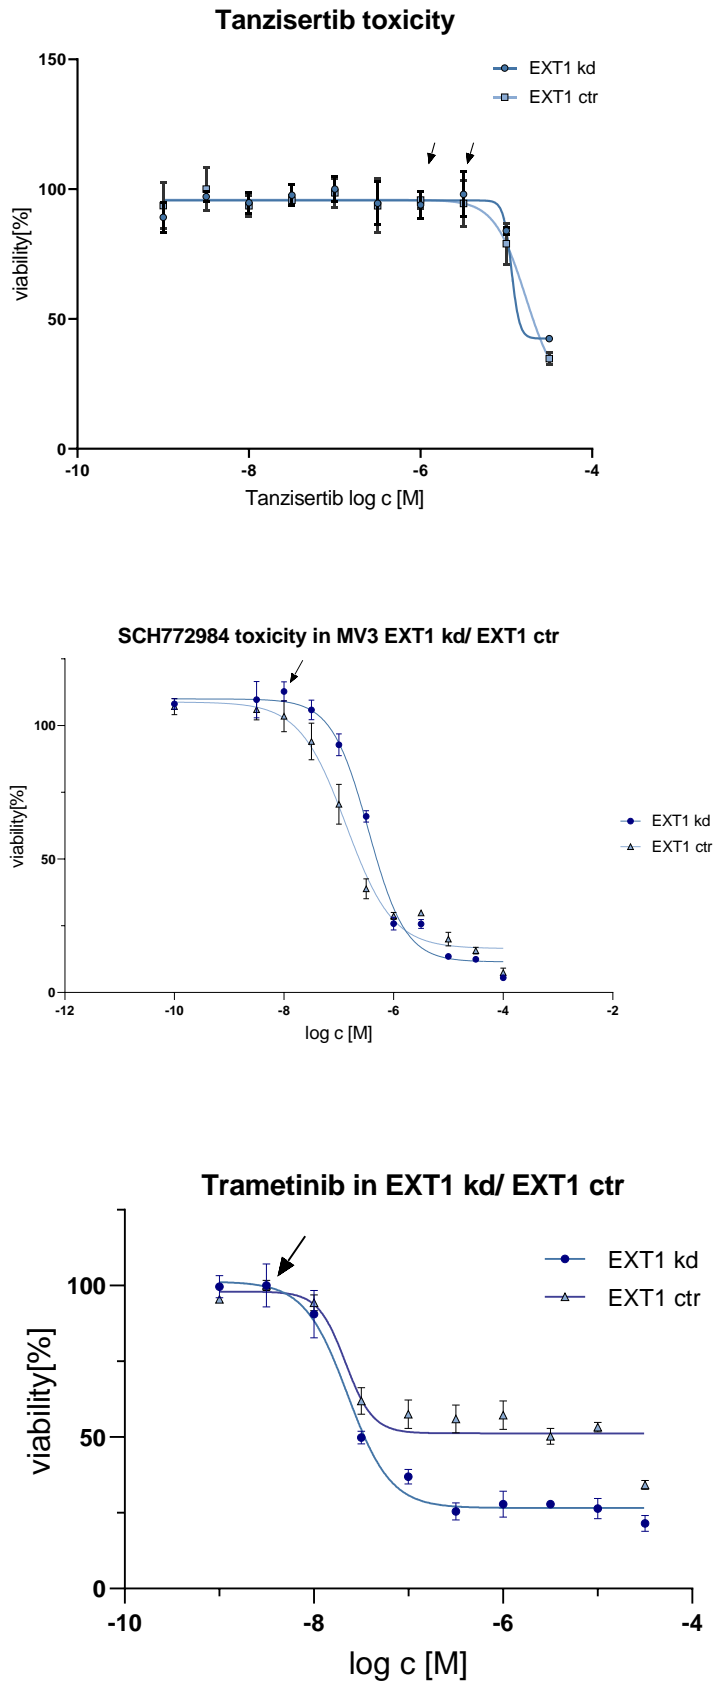

**Figure S4** – Cytotoxicity of tanzisertib, SCH772984 and trametinib in MV3<sub>EXT1kd</sub> and MV3<sub>EXTctr</sub> cells. Arrows indicate the non-toxic concentration used for the experiments shown in Figure 5 and Figure 6.
